# Supplementary material for: Enhancing the Immune Response of a Nicotine Vaccine with Synthetic Small “Non-Natural” Peptides
Source: MDPI journal article supplement (doi:10.3390/molecules25061290), 2020-03-12
Supplement: s1 [file s1]

## APPENDIX A

Enhancing the immune response of a nicotine vaccine with synthetic small “non-natural” peptides.

Hoang-Thanh Le, Nya L. Fraleigh, Jordan D. Lewicky, Justin Boudreau, Paul Dolinar, Nitin Bhardwaj, Francisco Diaz-Mitoma, Sabine Montaut, Sarah Fallahi, and Alexandrine L. Martel.

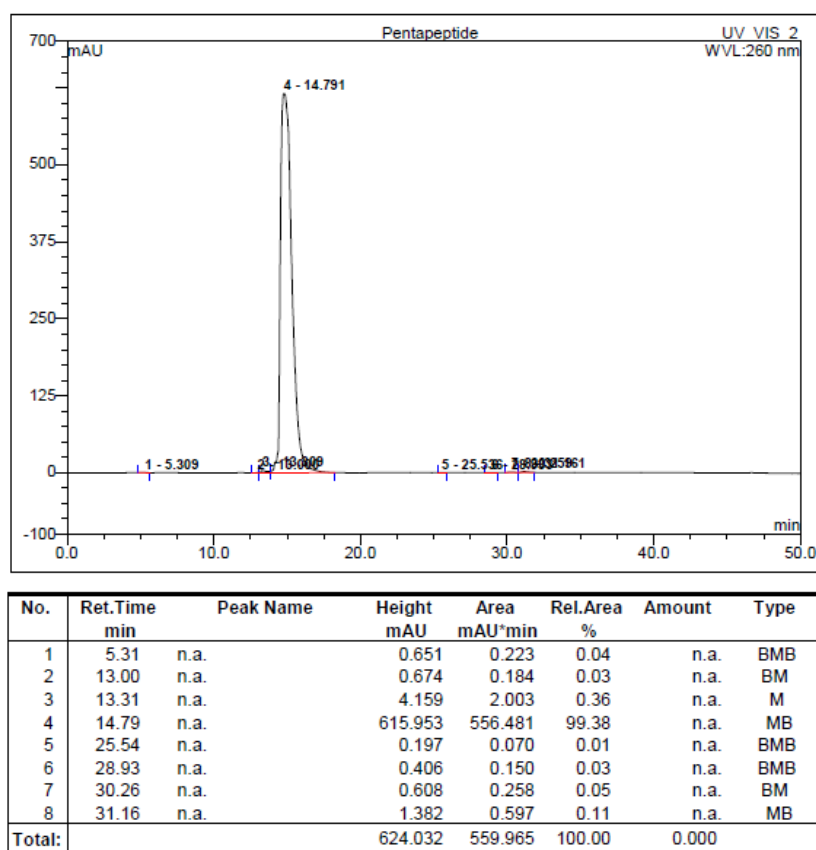

**Figure S1.** KWCEC peptide HPLC results (99.38% purity).

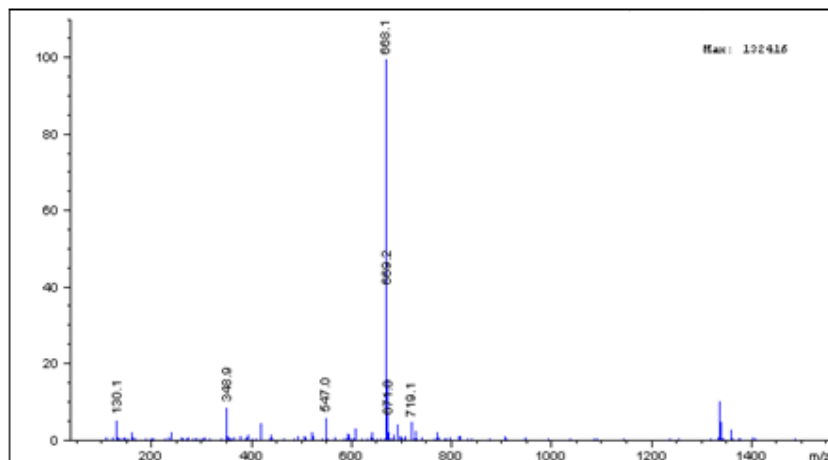

**Figure S2.** KWCEC peptide ESI-MS results.

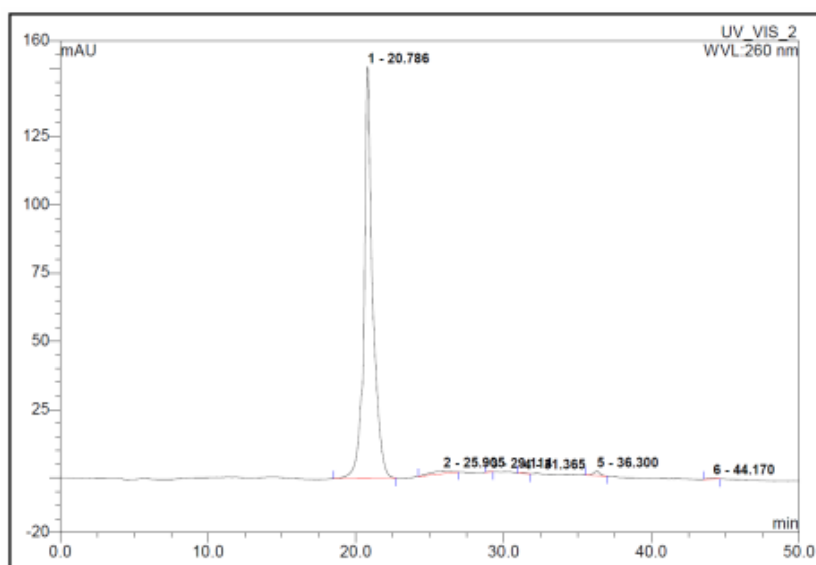

| No.    | Ret.Time<br>min | Peak Name | Height<br>mAU | Area<br>mAU*min | Rel.Area<br>% | Amount | Type |
|--------|-----------------|-----------|---------------|-----------------|---------------|--------|------|
| 1      | 20.79           | n.a.      | 150.743       | 102.805         | 97.32         | n.a.   | BMB  |
| 2      | 25.90           | n.a.      | 0.912         | 1.601           | 1.52          | n.a.   | BMB  |
| 3      | 29.11           | n.a.      | 0.142         | 0.052           | 0.05          | n.a.   | BMB  |
| 4      | 31.37           | n.a.      | 0.378         | 0.132           | 0.12          | n.a.   | BMB  |
| 5      | 36.30           | n.a.      | 1.788         | 0.848           | 0.80          | n.a.   | BMB  |
| 6      | 44.17           | n.a.      | 0.351         | 0.200           | 0.19          | n.a.   | BMB  |
| Total: |                 |           | 154.312       | 105.639         | 100.00        | 0.000  |      |

**Figure S3.** KWCECKFFKFFG peptide HPLC results (97.32% purity).

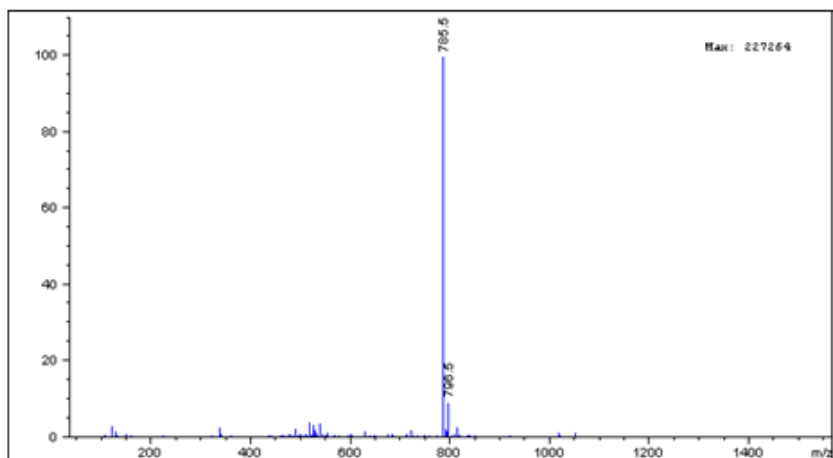

**Figure S4.** KWCECKFFKFFG peptide ESI-MS results.

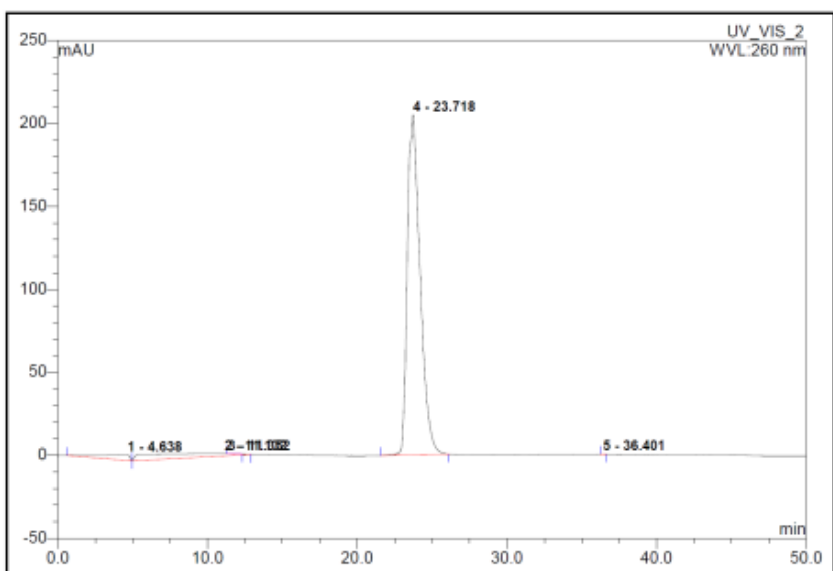

| No.    | Ret.Time<br>min | Peak Name | Height<br>mAU | Area<br>mAU*min | Rel.Area<br>% | Amount | Type |
|--------|-----------------|-----------|---------------|-----------------|---------------|--------|------|
| 1      | 4.64            | n.a.      | 3.347         | 6.939           | 3.06          | n.a.   | BMB  |
| 2      | 11.13           | n.a.      | 1.374         | 17.067          | 7.52          | n.a.   | BMB  |
| 3      | 11.35           | n.a.      | 0.052         | 0.084           | 0.04          | n.a.   | Rd   |
| 4      | 23.72           | n.a.      | 205.059       | 202.815         | 89.37         | n.a.   | BMB  |
| 5      | 36.40           | n.a.      | 0.122         | 0.024           | 0.01          | n.a.   | BMB  |
| Total: |                 |           | 209.954       | 226.929         | 100.00        | 0.000  |      |

**Figure S5.** KWCECEFFEFFG peptide HPLC results (89.37% purity).

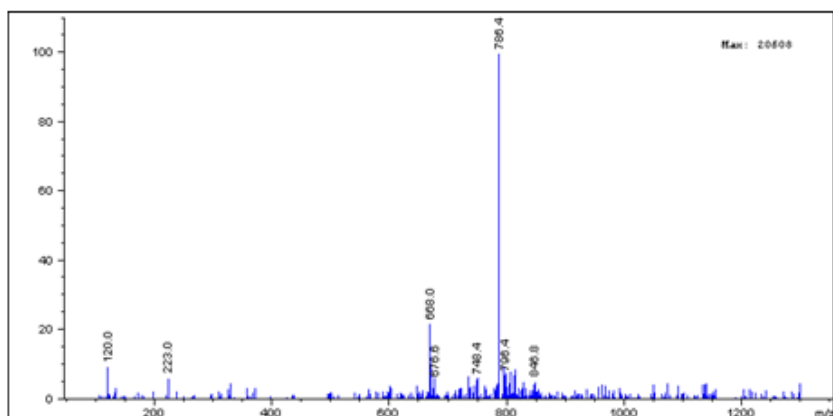

**Figure S6.** KWCECEFFEFG peptide ESI-MS results.

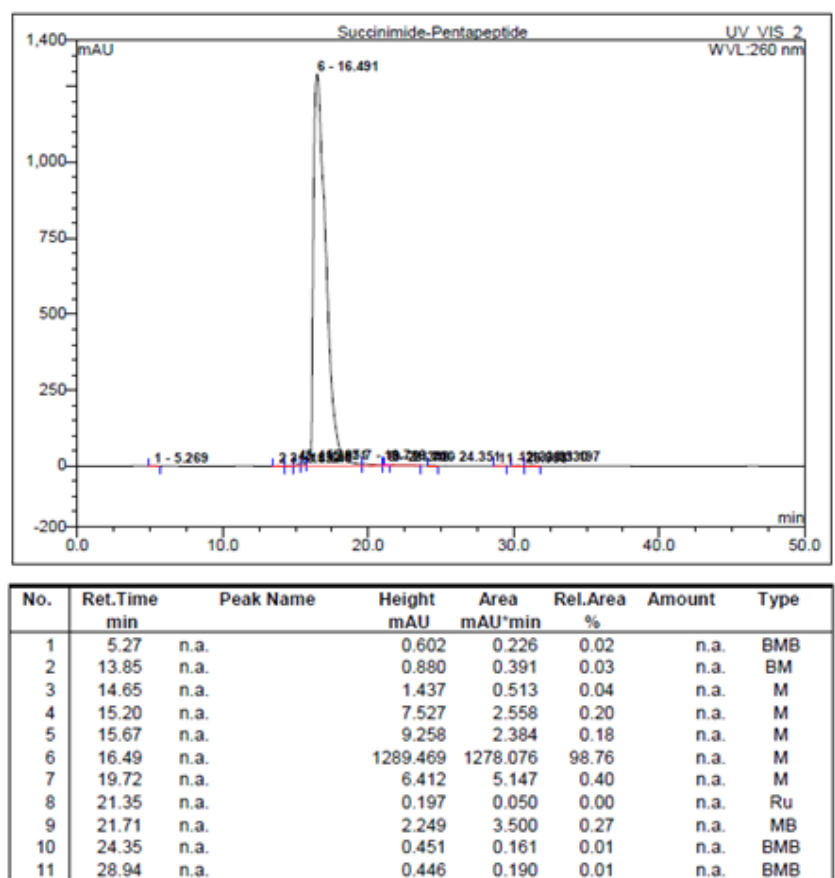

**Figure S7.** Succinamic KWCEC peptide HPLC results (98.76% purity).

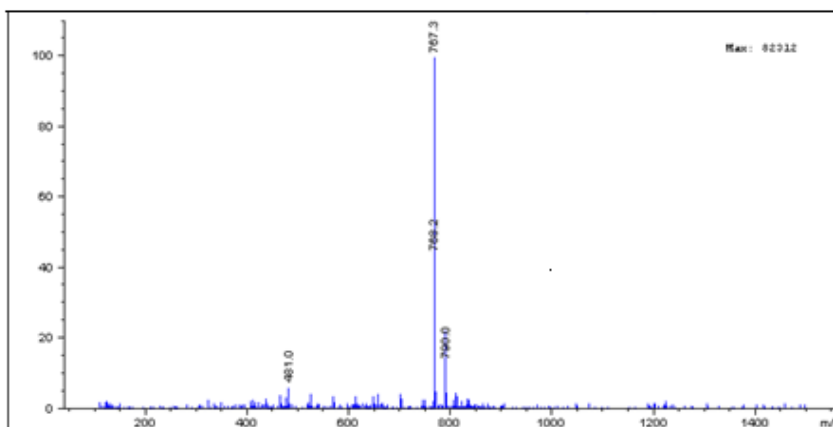

**Figure S8.** Succinamic KWCEC peptide ESI-MS results.
